# Supplementary material for: Effect of Demographic and Health Dynamics on Cognitive Status in Mexico between 2001 and 2015: Evidence from the Mexican Health and Aging Study
Source: MDPI journal article supplement (doi:10.3390/geriatrics6030063), 2021-06-25
Supplement: s1 [file s1]

## Supplementary Table S1.

Summary: Table S1 shows the distribution of sociodemographic variables, cardiovascular diseases, BMI levels, treatment of cardiovascular conditions and health insurance in those with normal cognition, CIND, and dementia between 2001 and 2015.

**Table S1.** Descriptive statistics of MHAS participants aged 60 and over in the 2001 and 2015 cohorts by cognitive status

|                               | Normal Cognition |             |     | CIND        |             |     | Dementia   |            |     |
|-------------------------------|------------------|-------------|-----|-------------|-------------|-----|------------|------------|-----|
|                               | 2001             | 2015        |     | 2001        | 2015        |     | 2001       | 2015       |     |
| N                             | 4819 (70.6)      | 8085 (79.1) | *** | 1589 (23.3) | 1383 (13.5) | *** | 414 (6.1)  | 751 (7.3)  | **  |
| Sex                           |                  |             |     |             |             |     |            |            |     |
| Male                          | 2224 (46.2)      | 3449(42.7)  | *** | 799 (50.3)  | 767 (55.5)  | **  | 146 (35.3) | 280 (37.3) |     |
| Female                        | 2595 (53.8)      | 4636 (57.3) |     | 790 (49.7)  | 616 (44.5)  |     | 268 (64.7) | 471 (62.7) |     |
| Age, y                        |                  |             |     |             |             |     |            |            |     |
| 60–74 years                   | 3768 (78.2)      | 5877 (72.7) | *** | 1269(79.9)  | 963 (69.6)  | *** | 187 (45.2) | 233 (31.0) | *** |
| ≥75 years                     | 1051 (21.8)      | 2208 (27.3) |     | 320 (20.1)  | 420 (30.4)  |     | 227 (54.8) | 518 (69.0) |     |
| Mean (SD)                     | 68.9 (7.2)       | 70.2 (7.5)  | *** | 68.6 (6.8)  | 71.0 (7.3)  | *** | 76.3 (9.5) | 79.5 (9.4) | *** |
| Education, y                  |                  |             |     |             |             |     |            |            |     |
| No schooling                  | 1535 (31.9)      | 1551 (19.2) | *** | 412 (25.9)  | 317 (22.9)  | +   | 191 (46.1) | 274 (36.5) | **  |
| 1-6 years                     | 2573 (53.4)      | 4407 (54.5) |     | 890 (56.0)  | 753 (54.4)  |     | 183 (44.2) | 381 (50.7) | *   |
| ≥7 years                      | 711 (14.8)       | 2127 (26.3) | *** | 287 (18.1)  | 313 (22.6)  | **  | 40 (9.7)   | 96 (12.8)  |     |
| Mean (SD)                     | 3.6 (4.0)        | 5.3 (4.6)   | *** | 3.8 (3.9)   | 4.3 (4.2)   | *** | 2.5 (3.4)  | 3.1 (3.7)  | **  |
| Residence                     |                  |             |     |             |             |     |            |            |     |
| Urban                         | 3548 (73.6)      | 5892 (72.9) |     | 1109 (69.8) | 864 (62.5)  | *** | 279 (67.4) | 511 (68.0) |     |
| Rural                         | 1271 (26.4)      | 2193 (27.1) |     | 480 (30.2)  | 519 (37.5)  |     | 135 (32.6) | 240 (32.0) |     |
| Cardiovascular diseases       |                  |             |     |             |             |     |            |            |     |
| Hypertension                  | 2043 (42.5)      | 4254 (52.6) | *** | 623 (39.3)  | 672 (48.6)  | *** | 210 (51.2) | 428 (57.0) | +   |
| Diabetes                      | 808 (16.8)       | 2121 (26.2) | *** | 274 (17.3)  | 349 (25.2)  | *** | 106 (25.8) | 216 (28.8) |     |
| Heart disease                 | 224 (4.7)        | 357 (4.4)   |     | 43 (2.7)    | 59 (4.3)    | *   | 31 (7.6)   | 61 (8.1)   |     |
| Stroke                        | 152 (3.2)        | 184 (2.3)   | **  | 46 (2.9)    | 26 (1.9)    |     | 56 (13.6)  | 83 (11.1)  |     |
| BMI                           |                  |             |     |             |             |     |            |            |     |
| Normal                        | 1693 (35.2)      | 2613 (32.4) | **  | 607 (38.2)  | 542 (39.2)  |     | 191 (46.1) | 356 (47.4) |     |
| Underweight                   | 96 (2.0)         | 126 (1.6)   |     | 39 (2.5)    | 27 (2.0)    |     | 23 (5.6)   | 32 (4.3)   |     |
| Overweight                    | 2135 (44.3)      | 3476 (43.0) |     | 697 (43.9)  | 595 (43.0)  |     | 151 (36.5) | 260 (34.6) |     |
| Obese                         | 890 (18.5)       | 1860 (23.0) | *** | 244 (15.4)  | 219 (15.8)  |     | 49 (11.8)  | 103 (13.7) |     |
| CVD Treatment <sup>a</sup>    |                  |             |     |             |             |     |            |            |     |
| Hypertension                  | 1550 (76.1)      | 3783 (89.0) | *** | 474 (76.2)  | 582 (86.6)  | *** | 166 (79.0) | 373 (87.1) | **  |
| Diabetes                      | 697 (86.3)       | 1982 (93.4) | *** | 239 (87.2)  | 321 (92.0)  | +   | 94 (88.7)  | 196 (90.7) |     |
| Heart disease                 | 155 (69.8)       | 256 (71.7)  |     | 35 (81.4)   | 40 (67.8)   |     | 21 (67.7)  | 45 (73.8)  |     |
| Stroke                        | 75 (49.3)        | 81 (44.0)   |     | 27 (58.7)   | 15 (57.7)   |     | 39 (69.6)  | 57 (68.7)  |     |
| Health insurance <sup>b</sup> | 3121 (64.8)      | 7458 (92.2) | *** | 954 (60.1)  | 1237(89.4)  | *** | 212 (51.2) | 681 (90.7) | *** |

Notes: CIND, cognitive impairment no dementia; BMI, body mass index; BMI Normal, 18.5-24.9; BMI Underweight, <18.5; BMI Overweight, 25-29.9; BMI Obese, ≥30; CVD, cardiovascular condition. Characteristics are presented as n (%) unless otherwise indicated. <sup>a</sup> Cardiovascular treatment for those with each condition. <sup>b</sup> Health care insurance for those with insurance.

\*\*\*p < .001, \*\*p < .01, \*p < .05, + p < .10.
